# Supplementary material for: Transmission of temporally correlated spike trains through synapses with short-term depression
Source: PLoS Comput Biol. 2018 Jun 22;14(6):e1006232. doi: 10.1371/journal.pcbi.1006232 (PMC6039054; doi:10.1371/journal.pcbi.1006232)
Supplement: S1 Code — It plots the ISI densities (Eq 3) and cumulative densities for different values of α. It plots the two occupancy means 〈x〉∞ and 〈x〉 (Eq 9) as a function of α, as well as their variances and the vesicle release mean 〈χ〉. (JSON) [file pcbi.1006232.s001.json]

# %% [markdown]
## Figure 1

* **Fig 1A.** $z$, $x$ and $\chi$ time courses
* **Fig 2B.** $f(t)$ versus time
* **Fig 3C.** $C(t)$ versus tine
* **Fig 3D.** $\langle x \rangle$ for general case and pre-spike as a function of $\alpha$
* **Fig 3E.** Variance of $\langle x \rangle$ as a function of $\alpha$
* **Fig 3F.** $\chi$ as a function of $\alpha$

# %% [code]
using PyPlot
pygui(true);
srand(6);

# %% [markdown]
## General parameters

# %% [code]
Ra=0.005
Rr=0.002
p=0.6
q=1-p

alpha1=0.4
alpha2=1.0
alpha3=8.0

dt=0.01
dx=0.0001
;


# %% [markdown]
## The functions

# %% [code]
#################################################################################
# does a sims over z and uses that for 
#
# inputs: dx (step for the cumdist), alpha, Ra (pre-rate), Rr (restock rate)
#         p (release prob), dt and T (time step and sim duration)
#
# output: <x>_inf, <x>, Var(x)_inf, Var(x), <chi>, each for sim then theory
#
#################################################################################
function MyDoARun(dx,a,Ra,Rr,p,dt,T)
    
    q=1-p
    
    # get the random ISI generator 
    dx=0.0001
    ISI,C=MyVarIntCumGamma(dx,a,Ra)
    
    # runs the simulations
    t,z=MyPreSynAPs(dt,T,ISI)
    x,xinfs,c=MyPreSynX(t,z,p,Rr,0.0)
    
    xinf=mean(xinfs) # sim <x>_inf       
    mx=mean(x)       # sim <x>
    
    vxinf=var(xinfs) # sim Var(x)_inf
    vmx=var(x)       # sim Var(x)
    
    mc=sum(c)/T      # sim <chi>, i.e. the release rate
    
    # does the theory
    L=(a*Ra/(Rr+a*Ra)).^a
 
    xinfTH=(1-L)/(1-q*L)      # <x>_inf
    mxTH=1-p*xinfTH*Ra/Rr     # <x>
    
    vxinfTH=xinfTH*(1-xinfTH) # Var(x)_inf
    vmxTH=mxTH*(1-mxTH)       # Var(x)
    
    mcTH=xinfTH*p             # <chi>
    
    return xinf,xinfTH,mx,mxTH,vxinf,vxinfTH,vmx,vmxTH,mc,mcTH

end

#################################################################################
# gamma distribution as a function of time
#
# inputs:   time step & total time as well as gamma parameters alpha and r
# outputs:  time th (on half sites) and distribution f
#
# NOTES:
# on half sites to avoid infinity at t=0 if alpha<1
#################################################################################
function MyGamma(dt,T,alpha,r)
    
    th=collect(dt/2:dt:T-dt/2)
    kappa=((alpha*r)^alpha)/gamma(alpha)
    f=kappa*exp(-alpha*r*th+(alpha-1)*log(th))
    
    return th,f
end

#################################################################################
# makes a time series for t with the correct ISI distribution
#
# inputs:    dt, T and the string of ISIs to pick randomly from
# outputs:   t and z
#
# NOTES: t runs from dt not zero
#################################################################################
function MyPreSynAPs(dt,T,ISI)
    
    t=collect(dt:dt:T)
    nt=length(t)
    z=zeros(nt)
    
    snow=1
    while snow<nt
        z[snow]=1.0
        ISInow=rand(ISI)
        snow=snow+Int(ceil(ISInow/dt))
    end
    z[1]=0.0

  return t,z
end

#################################################################################
# creates an occupancy time series from a presynaptic spike train.
#
# inputs:   t,z is the AP time series, p prob of release, Rr restock rate
#           and x0 is the initial condition
# outputs:  x as a time series, the list of x before the APs 
#           and c the time series of the release (chi in the notes)
#
# NOTES:    z has 1 if there is a spike, not 1/dt
#################################################################################
function MyPreSynX(t,z,p,Rr,x0)
    
    dt=t[2]-t[1]
    nz=length(z)
    x=zeros(nz); x[1]=x0
    c=zeros(nz)
    
    for k=1:nz-1
        c[k]=(rand()<p)*x[k]*z[k]
        x[k+1]=x[k] - c[k] + (rand()<dt*Rr)*(1-x[k])
    end
    
    s=find(z.>0)
    if s[1]==1
        s=s[2:end]
    end

    xinfs=x[s-1]
    
    return x,xinfs,c
end

#################################################################################
# cumulative gamma distribution: fixed intervals for the cumdist and variable t
#
# inputs:   dx (the step for the cumdist), alpha and r (the gamma parameters)
# outputs:  time t, and the cumdist C
#
# NOTES:
#################################################################################
function MyVarIntCumGamma(dx,alpha,r)
    
    C=collect(0:dx:1)
    n=length(C)
    t=zeros(n)
    
    kappa=((alpha*r)^alpha)/gamma(alpha)
    dt=(dx*alpha*gamma(alpha))^(1/alpha)/(r*alpha)
    
    for k=2:n-1
        t[k]=t[k-1]+dt
        f=kappa*exp(-alpha*r*t[k]+(alpha-1)*log(t[k]))
        dtG=dx/f
        th=t[k]+dtG/2
        fh=kappa*exp(-alpha*r*th+(alpha-1)*log(th))
        dt=dx/fh
    end
    
    # last point is doubled up
    t[end]=t[end-1]
    
    return t,C
end
;

# %% [markdown]
## Create the data

# %% [markdown]
### Fig 1A data

# %% [code]
T=5000
x0=0.0

ISI1,C1=MyVarIntCumGamma(dx,alpha1,Ra)
ISI2,C2=MyVarIntCumGamma(dx,alpha2,Ra)
ISI3,C3=MyVarIntCumGamma(dx,alpha3,Ra)

t,z1=MyPreSynAPs(dt,T,ISI1)
t,z2=MyPreSynAPs(dt,T,ISI2)
t,z3=MyPreSynAPs(dt,T,ISI3)

x1,~,c1=MyPreSynX(t,z1,p,Rr,x0)
x2,~,c2=MyPreSynX(t,z2,p,Rr,x0)
x3,~,c3=MyPreSynX(t,z3,p,Rr,x0);

# %% [markdown]
### Fig 1B and 1C data

# %% [code]
K=1000
dtt=0.1
TT=1000

# get the fpt
th,f1=MyGamma(dtt,TT,alpha1,Ra)
th,f2=MyGamma(dtt,TT,alpha2,Ra)
th,f3=MyGamma(dtt,TT,alpha3,Ra)

# tidies up the curve
ISI3[end]=1000.0
C3[end]=1.0;

# %% [markdown]
### Fig 1D, 1E and 1F data

# %% [code]

T=10*1000.0
nsweeps=3

a1,a2,aN=0.1,10.0,10
aL=exp(collect(linspace(log(a1),log(a2),aN)))

# % of ISIs below dt for the smallest a
ISI,C=MyVarIntCumGamma(dx,aL[1],Ra)
perbelow=sum(ISI.<dt)/(1.0*length(ISI))
println("NB $(round(100*perbelow,3))% of ISIs are below dt=$(dt)ms for a=$(aL[1])")

xinf,mx=zeros(aN,nsweeps),zeros(aN,nsweeps)
xinfTH,mxTH=zeros(aN),zeros(aN)

vxinf,vmx=zeros(aN,nsweeps),zeros(aN,nsweeps)
vxinfTH,vmxTH=zeros(aN),zeros(aN)

mc=zeros(aN,nsweeps)
mcTH=zeros(aN)

for k=1:aN
  for j=1:nsweeps
    xinf[k,j],xinfTH[k],mx[k,j],mxTH[k],vxinf[k,j],vxinfTH[k],vmx[k,j],vmxTH[k],mc[k,j],mcTH[k]=MyDoARun(dx,aL[k],Ra,Rr,p,dt,T)
  end
end

Mxinf=mean(xinf,2)
Sxinf=std(xinf,2)/sqrt(nsweeps)

Mmx=mean(mx,2)
Smx=std(mx,2)/sqrt(nsweeps)

Mvxinf=mean(vxinf,2)
Svxinf=std(vxinf,2)/sqrt(nsweeps)

Mvmx=mean(vmx,2)
Svmx=std(vmx,2)/sqrt(nsweeps)

Mmc=mean(mc,2)
Smc=std(mc,2)/sqrt(nsweeps)
mcTH=xinfTH*p*Ra;


# %% [markdown]


## Plot the figure

# %% [code]
close("all")
fig1=figure(figsize=(10,4));

# %% [markdown]
### General figure parameters

# %% [code]
clf()

showsims=false

textfs=9
panelfs=10
labelfs=9
tickfs=8
figlabelfs=10
lw=1
;

# %% [markdown]
### Fig 1A plot

# %% [code]
TS=5000

l1=0.05 # left edge of this column
w1=0.3  # width of the column
h1=0.05 # height of each component

p1,p2,p3=0.125,0.425,0.725 # positions of three sets
g1=0.075 # gap 1st and 2nd component
g2=0.15 # gap between 2nd and 3rd component of a set

# For alpha 1

ax1=axes([l1,p3+g2,w1,h1]); 
ax1[:plot](t,z1,"b-",linewidth=lw)
ax1[:spines]["top"][:set_visible](false)
ax1[:spines]["right"][:set_visible](false)
ax1[:spines]["left"][:set_visible](false)
ax1[:axis]([0,TS,0,1.01])
ax1[:set_yticks]([])
ax1[:set_xticklabels]([]) 
ax1[:tick_params](axis="both",labelsize=tickfs)

ax2=axes([l1,p3+g1,w1,h1])
ax2[:plot](t,x1,"b-",linewidth=lw)
ax2[:spines]["top"][:set_color]("none")
ax2[:spines]["right"][:set_color]("none")
ax2[:spines]["left"][:set_visible](false)
ax2[:set_yticks]([])
ax2[:set_xticklabels]([]) 
ax2[:axis]([0,TS,0,1.01])
ax2[:tick_params](axis="both",labelsize=tickfs)

ax3=axes([l1,p3,w1,h1])
ax3[:plot](t,c1,"b-",linewidth=lw)
ax3[:spines]["top"][:set_color]("none")
ax3[:spines]["right"][:set_color]("none")
ax3[:spines]["left"][:set_visible](false)
ax3[:set_yticks]([])
ax3[:axis]([0,TS,0,1.01])
ax3[:tick_params](axis="both",labelsize=tickfs)

# For alpha 2

ax4=axes([l1,p2+g2,w1,h1])
ax4[:plot](t,z2,"g-",linewidth=lw)
ax4[:spines]["top"][:set_visible](false)
ax4[:spines]["right"][:set_visible](false)
ax4[:spines]["left"][:set_visible](false)
ax4[:axis]([0,TS,0,1.01])
ax4[:set_yticks]([])
ax4[:set_xticklabels]([]) 

ax5=axes([l1,p2+g1,w1,h1])
ax5[:plot](t,x2,"g-",linewidth=lw)
ax5[:spines]["top"][:set_color]("none")
ax5[:spines]["right"][:set_color]("none")
ax5[:spines]["left"][:set_visible](false)
ax5[:set_yticks]([])
ax5[:set_xticklabels]([]) 
ax5[:axis]([0,TS,0,1.01])

ax6=axes([l1,p2,w1,h1])
ax6[:plot](t,c2,"g-",linewidth=lw)
ax6[:spines]["top"][:set_color]("none")
ax6[:spines]["right"][:set_color]("none")
ax6[:spines]["left"][:set_visible](false)
ax6[:set_yticks]([])
ax6[:axis]([0,TS,0,1.01])
ax6[:tick_params](axis="both",labelsize=tickfs)

# for alpha 3

ax7=axes([l1,p1+g2,w1,h1])
ax7[:plot](t,z3,"r-",linewidth=lw)
ax7[:spines]["top"][:set_visible](false)
ax7[:spines]["right"][:set_visible](false)
ax7[:spines]["left"][:set_visible](false)
ax7[:axis]([0,TS,0,1.01])
ax7[:set_yticks]([])
ax7[:set_xticklabels]([]) 

ax8=axes([l1,p1+g1,w1,h1])
ax8[:plot](t,x3,"r-",linewidth=lw)
ax8[:spines]["top"][:set_color]("none")
ax8[:spines]["right"][:set_color]("none")
ax8[:spines]["left"][:set_visible](false)
ax8[:set_yticks]([])
ax8[:set_xticklabels]([]) 
ax8[:axis]([0,TS,0,1.01])
ax8[:tick_params](axis="both",labelsize=tickfs)

ax9=axes([l1,p1,w1,h1])
ax9[:plot](t,c3,"r-",linewidth=lw)
ax9[:spines]["top"][:set_color]("none")
ax9[:spines]["right"][:set_color]("none")
ax9[:spines]["left"][:set_visible](false)
ax9[:set_yticks]([])
ax9[:axis]([0,TS,0,1.01])
ax9[:set_xlabel]("time (ms)",fontsize=labelfs)
ax9[:tick_params](axis="both",labelsize=tickfs)

fig1[:text](0.02, 0.95, "A", fontsize=panelfs)


# %% [markdown]
### Fig 1B and 1C plots

# %% [code]
o1=0.125 # offset between first column and second
l2=l1+w1+o1 #left edge of column
w2=0.15 # width of this column
h2=0.35 # height of each fig
p4,p5=0.575,0.125 # vertical position of each fig

ax10=axes([l2,p4,w2,h2])
ax10[:plot](th,K*f1,"b",linewidth=lw)
ax10[:plot](th,K*f2,"g",linewidth=lw)
ax10[:plot](th,K*f3,"r",linewidth=lw)
ax10[:axis]([0,1000,0,10])
ax10[:set_ylabel]("f(t) (Hz)",fontsize=labelfs)
ax10[:spines]["right"][:set_visible](false)
ax10[:spines]["top"][:set_visible](false)
ax10[:tick_params](axis="both",labelsize=tickfs)

fig1[:text](0.55, 0.8, L"$\alpha=0.4$",color="b", fontsize=textfs)
fig1[:text](0.55, 0.75, L"$\alpha=1.0$",color="g", fontsize=textfs)
fig1[:text](0.55, 0.7, L"$\alpha=8.0$",color="r", fontsize=textfs)

ax11=axes([l2,p5,w2,h2])
ax11[:plot](ISI1,C1,"b",linewidth=lw)
ax11[:plot](ISI2,C2,"g",linewidth=lw)
ax11[:plot](ISI3,C3,"r",linewidth=lw)
ax11[:axis]([0,1000,0,1.01])
ax11[:set_xlabel]("time (ms)",fontsize=labelfs)
ax11[:set_ylabel]("cumulitive dist",fontsize=labelfs)
ax11[:spines]["right"][:set_visible](false)
ax11[:spines]["top"][:set_visible](false)
ax11[:tick_params](axis="both",labelsize=tickfs)

fig1[:text](l2-0.075, 0.95, "B", fontsize=panelfs)
fig1[:text](l2-0.075, 0.5, "C", fontsize=panelfs)


# %% [markdown]
### Fig 1D, 1E and 1F plots

# %% [code]
o3=0.125
l3=l2+w2+o3 #left edge of column
w3=0.2 # width of this column
h3=0.2 # height of each fig

mygray="0.5"

ms=3 # marker size

ax12=axes([l3,p3,w3,h3])
ax12[:semilogx](aL,xinfTH,"k-",linewidth=lw)
ax12[:semilogx](aL,mxTH,color="0.5",linewidth=lw)
ax12[:set_ylabel]("occupancy",fontsize=labelfs)
ax12[:spines]["right"][:set_visible](false)
ax12[:spines]["top"][:set_visible](false)
ax12[:axis]([0.1,10,0.2,0.7])
ax12[:set_yticks]([0.2,0.4,0.6])
ax12[:tick_params](axis="both",labelsize=tickfs)
if showsims
    ax12[:errorbar](aL[:,1],Mmx[:,1],Smx[:,1],color=mygray,marker="o",ls="None",markersize=ms)
    ax12[:errorbar](aL[:,1],Mxinf[:,1],Sxinf[:,1],color="k",marker="o",ls="None",markersize=ms)
end
    
ax13=axes([l3,p2,w3,h3])
ax13[:semilogx](aL,vxinfTH,"k-",linewidth=lw)
ax13[:semilogx](aL,vmxTH,color=mygray,linewidth=lw)
ax13[:set_ylabel]("occ. variances",fontsize=labelfs)
ax13[:spines]["right"][:set_visible](false)
ax13[:spines]["top"][:set_visible](false)
ax13[:axis]([0.1,10,0.15,0.26])
ax13[:tick_params](axis="both",labelsize=tickfs)
if showsims
    ax13[:errorbar](aL[:,1],Mvxinf[:,1],Svxinf[:,1],color="k",marker="o",ls="None",markersize=ms)
    ax13[:errorbar](aL[:,1],Mvmx[:,1],Svmx[:,1],color=mygray,marker="o",ls="None",markersize=ms)
end
    
ax14=axes([l3,p1,w3,h3])
ax14[:semilogx](aL,K*mcTH,"k-",linewidth=lw)
ax14[:set_ylabel](L"$\chi$ (Hz)",fontsize=labelfs)
ax14[:set_xlabel](L"Shape parameter $\alpha$",fontsize=labelfs)
ax14[:spines]["right"][:set_visible](false)
ax14[:spines]["top"][:set_visible](false)
ax14[:axis]([0.1,10,0.5,1.5])
ax14[:tick_params](axis="both",labelsize=tickfs)
if showsims
    ax14[:errorbar](aL[:,1],K*Mmc[:,1],K*Smc[:,1],color="k",marker="o",ls="None",markersize=3)
end
    
fig1[:text](l3-0.075, 0.95, "D", fontsize=panelfs)
fig1[:text](l3-0.075, 0.65, "E", fontsize=panelfs)
fig1[:text](l3-0.075, 0.35, "F", fontsize=panelfs)

# %% [markdown]
## Save figure

# %% [code]
if true
    savefig("fig1.pdf")
end

# %% [code]


# %% [code]


# %% [code]


# %% [code]


# %% [code]


# %% [code]


# %% [code]


# %% [code]


# %% [code]
