# Supplementary material for: Transmission of temporally correlated spike trains through synapses with short-term depression
Source: PLoS Comput Biol. 2018 Jun 22;14(6):e1006232. doi: 10.1371/journal.pcbi.1006232 (PMC6039054; doi:10.1371/journal.pcbi.1006232)
Supplement: S2 Code — It plots event-triggered rates, auto-covariances, and power spectra for the afferent spike train and vesicle release (Eqs 18 to 21). It plots the post-synaptic voltage mean (Eq 24), standard deviation (Eq 29), and coefficient of variation as a function of α. (JSON) [file pcbi.1006232.s002.json]

# %% [markdown]
## Figure 2


* **Fig 2Ai and 2Aii.** F(t) and pG(t) which are spike-triggered presynaptic and release rate densities.
* **Fig 2Bi and 2Bii.** The AutoCovariance for these quantities.
* **Fig 3Ci abd 3Cii.** The power spectrum for these quantities.
* **Fig D.** Post-synaptic voltage mean, std and CV

# %% [code]
using PyPlot
pygui(true);

# %% [code]
srand(5);

# %% [markdown]
## General parameters

# %% [code]
K=1000

Ra=0.005
Rr=0.002
p=0.6
q=1-p

alpha1=0.4
alpha2=1.0
alpha3=8.0

Npre=1000

taupost=20
mupost=0
apost=0.3;

# %% [markdown]
## Functions

# %% [code]
#################################################################################
# gamma distribution as a function of time
#
# inputs:   time step & total time as well as gamma parameters alpha and r
# outputs:  time th (on half sites) and distribution f
#
# NOTES:
# on half sites to avoid infinity at t=0 if alpha<1
#################################################################################
function MyGamma(dt,T,alpha,r)
    
    th=collect(dt/2:dt:T-dt/2)
    kappa=((alpha*r)^alpha)/gamma(alpha)
    f=kappa*exp(-alpha*r*th+(alpha-1)*log(th))
    
    return th,f
end

#################################################################################
# Theoretical spike-triggered rate required for cross correlation
# Uses series method on p113 NEWBOOK 6
#
# inputs:  half-site time, alpha, presynaptic rate, upper limit for sum
# outputs: F(t)
#################################################################################
function MyFt(th,alpha,Ra,M)
    
    nth=length(th)
    J=zeros(nth,M)
    for m=1:M
        J[:,m]=((Ra*alpha*th).^(m*alpha))/gamma(m*alpha)
    end
    
    F=exp(-alpha*Ra*th).*sum(J,2)./th
    if length(find(isnan(F)))>0
        println("!!! Nan in F(t) !!!")
    end
        
    return F

end

#################################################################################
# Calculates Gt: see P114-P116 of NEWBOOK 6)
#################################################################################
function MyGt(th,f,F,alpha,Ra,Rr,p)
        
    dth=th[2]-th[1]
    nth=length(th)
    q=1-p
    
    g=f.*(1-exp(-Rr*th))
    h=f.*exp(-Rr*th)
    
    IFg=zeros(nth)
    
    for k=1:nth
       IFg[k]=dth*sum(F[1:k].*g[k:-1:1]) 
    end
    
    # get Gt
    Gt=zeros(length(th))
    
    Gt[1]=(g[1]+IFg[1])/(1-q*(dth/2)*h[1])
    for k=2:length(th)
        Gt[k]=(g[k]+IFg[k]+q*dth*sum(Gt[1:k-1].*h[k:-1:2]))/(1-q*h[1]*dth/2)
    end
    
    return Gt
end
    
#################################################################################
# gets xinf
#################################################################################
function MyXinf(alpha,Ra,Rr,p)
    
    q=1-p
    L=(alpha*Ra/(Rr+alpha*Ra)).^alpha
    xinf=(1-L)/(1-q*L)      # <x>_inf
    
    return xinf
end
    
#################################################################################
# Fourier transform of f(t) but we allow w to be complex
#################################################################################
function Myfw(w,alpha,Ra)

    fw=(alpha*Ra./(1im*w+alpha*Ra)).^alpha
    return fw
    
end

#################################################################################
#################################################################################
#################################################################################
# calculates the voltage mean and variance
#################################################################################
#################################################################################
#################################################################################
function MyVoltStats(alpha,Ra,Rr,p,tau,mu,a,N)
    
    q=1-p
    L=(alpha*Ra/(Rr+alpha*Ra)).^alpha
    
    xinfTH=(1-L)/(1-q*L)
    Mchi=Ra*xinfTH*p
    
    C1=(alpha*tau*Ra/(1+alpha*tau*Ra))^alpha
    C2=(alpha*tau*Ra/(1+tau*Rr+alpha*tau*Ra))^alpha
    C3=(C1-C2)/((1-C1)*(1-q*C2))
    
    MSTH=N*Mchi
    MvTH=mu+a*tau*N*p*Ra*xinfTH
    VvTH=(tau*N*a^2*Mchi/2.0)*(1+2*p*(C3-tau*Ra*xinfTH))
    
    return MvTH, VvTH, MSTH

end
;

# %% [markdown]
## Create the data

# %% [markdown]
### Fig 2Ai and 2Aii data for F(t) and G(t)

# %% [code]

dtt=0.1 
TT=1000

# get the fpt density
th,f1=MyGamma(dtt,TT,alpha1,Ra)
th,f2=MyGamma(dtt,TT,alpha2,Ra)
th,f3=MyGamma(dtt,TT,alpha3,Ra)

# generate F(t) for the three alphas
M=20; F1=MyFt(th,alpha1,Ra,M)
M=10; F2=MyFt(th,alpha2,Ra,M)
M=10; F3=MyFt(th,alpha3,Ra,M);

# generate G(t) for the three alphas
G1=MyGt(th,f1,F1,alpha1,Ra,Rr,p)
G2=MyGt(th,f2,F2,alpha2,Ra,Rr,p)
G3=MyGt(th,f3,F3,alpha3,Ra,Rr,p)

# these are needed for the asymptotics
xinf1=MyXinf(alpha1,Ra,Rr,p)
xinf2=MyXinf(alpha2,Ra,Rr,p)
xinf3=MyXinf(alpha3,Ra,Rr,p)

G1late=Ra*xinf1
G2late=Ra*xinf2
G3late=Ra*xinf3;

# %% [markdown]
### Fig 2Bi and Bii data for presynaptic rate and  $\chi(t)$ autocovariane

# %% [code]
chi1=p*Ra*xinf1
chi2=p*Ra*xinf2
chi3=p*Ra*xinf3
Achi1=chi1*(p*G1-chi1)
Achi2=chi2*(p*G2-chi2)
Achi3=chi3*(p*G3-chi3);

# %% [markdown]
### Fig 2Ci and 2Cii data for presynaptic rate and $\chi(t)$ power spectra

# %% [code]
# define the frequency
fHzS,fHzE,nfHz=0.1,1000,100;
fHz=exp(collect(linspace(log(fHzS),log(fHzE),nfHz)))
fkHz=fHz/1000.0
w=fkHz*2*pi

fw1=Myfw(w,alpha1,Ra);
fw2=Myfw(w,alpha2,Ra);
fw3=Myfw(w,alpha3,Ra);

fwRr1=Myfw(w-1im*Rr,alpha1,Ra);
fwRr2=Myfw(w-1im*Rr,alpha2,Ra);
fwRr3=Myfw(w-1im*Rr,alpha3,Ra);

# power spectrum for incoming APs
Fw1=fw1./(1-fw1)
Fw2=fw2./(1-fw2)
Fw3=fw3./(1-fw3)

Swr1=Ra*(1+2*real(Fw1))
Swr2=Ra*(1+2*real(Fw2))
Swr3=Ra*(1+2*real(Fw3))

# power spectrum for release events

Gw1=(1./(1-fw1)).*(fw1-fwRr1)./(1-q*fwRr1)
Gw2=(1./(1-fw2)).*(fw2-fwRr2)./(1-q*fwRr2)
Gw3=(1./(1-fw3)).*(fw3-fwRr3)./(1-q*fwRr3)

Swchi1=chi1*(1+2*p*real(Gw1))
Swchi2=chi2*(1+2*p*real(Gw2))
Swchi3=chi3*(1+2*p*real(Gw3))

# %% [markdown]
### Fig 2D post-synaptic voltage mean, variance and CV

# %% [code]
# set up the alpha range
alphaN=10
alphaL=exp(collect(linspace(log(0.1),log(10),alphaN)))

MvTHalpha=zeros(alphaN)
VvTHalpha=zeros(alphaN)

for k=1:alphaN
    MvTHalpha[k],VvTHalpha[k],MSTH=MyVoltStats(alphaL[k],Ra,Rr,p,taupost,mupost,apost,Npre)
end

SvTHalpha=sqrt(VvTHalpha)
CVTHalpha=SvTHalpha./MvTHalpha
;

# %% [code]


# %% [markdown]
## Plot the figure

# %% [code]
close("all")
fig2=figure(figsize=(6,4));

# %% [markdown]
### General figure parameters

# %% [code]
clf()

showsims=false

textfs=8
labelfs=9
tickfs=8
figlabelfs=10
lw=1

l1=0.125
r3=0.9
h1=0.2
w1=0.175
b1=0.125
t1=0.95

p1=b1
p2=(t1-h1+p1)/2
p3=t1-h1;

l2=(r3-w1+l1)/2
l3=r3-w1+0.05
;

# %% [markdown]
### Plot Fig 2Ai and 2Aii for F(t) and G(t)

# %% [code]
ax1=axes([l1,p3,w1,h1]); 
ax1[:plot](th,F1*K,"b-",linewidth=lw)
ax1[:plot](th,F2*K,"g-",linewidth=lw)
ax1[:plot](th,F3*K,"r",linewidth=lw)
ax1[:spines]["top"][:set_visible](false)
ax1[:spines]["right"][:set_visible](false)
ax1[:axis]([0,TT,0,10.0])
ax1[:set_ylabel]("F(t) (Hz)",fontsize=labelfs,labelpad=11)
ax1[:set_xlabel]("Time (ms)",fontsize=labelfs)
ax1[:tick_params](axis="both",labelsize=tickfs)
fig2[:text](0.02, 0.95, "Ai", fontsize=figlabelfs)

ax2=axes([l2,p3,w1,h1]); 
ax2[:plot](th,p*G1*K,"b",linewidth=lw)
ax2[:plot](th,p*G2*K,"g",linewidth=lw)
ax2[:plot](th,p*G3*K,"r",linewidth=lw)
ax2[:plot]([th[1],th[end]],K*p*G1late*[1,1],"b:",linewidth=lw)
ax2[:plot]([th[1],th[end]],K*p*G2late*[1,1],"g:",linewidth=lw)
ax2[:plot]([th[1],th[end]],K*p*G3late*[1,1],"r:",linewidth=lw)
ax2[:spines]["top"][:set_visible](false)
ax2[:spines]["right"][:set_visible](false)
ax2[:axis]([0,TT,0,2.0])
ax2[:set_ylabel]("pG(t) (Hz)",fontsize=labelfs,labelpad=11)
ax2[:set_xlabel]("Time (ms)",fontsize=labelfs)
ax2[:tick_params](axis="both",labelsize=tickfs)

fig2[:text](l2-0.1, 0.95, "Aii", fontsize=figlabelfs)

fig2[:text](0.19, 0.94, L"$\alpha=0.4$",color="b", fontsize=textfs)
fig2[:text](0.19, 0.91, L"$\alpha=1.0$",color="g", fontsize=textfs)
fig2[:text](0.19, 0.88, L"$\alpha=8.0$",color="r", fontsize=textfs)


# %% [markdown]
### Plot Fig 2Bi and 2Bii for presynaptic and $\chi(t)$ AutoCov

# %% [code]
ax3=axes([l1,p2,w1,h1]); 
ax3[:plot](th,Rr*(F1-Ra)*K^2,"b",linewidth=lw)
ax3[:plot](th,Rr*(F2-Ra)*K^2,"g",linewidth=lw)
ax3[:plot](th,Rr*(F3-Ra)*K^2,"r",linewidth=lw)
ax3[:spines]["top"][:set_visible](false)
ax3[:spines]["right"][:set_visible](false)
ax3[:axis]([0,TT,-15,15.0])
ax3[:set_ylabel](L"AC(r) (Hz$^2$)",fontsize=labelfs)
ax3[:set_xlabel]("Time (ms)",fontsize=labelfs)
ax3[:tick_params](axis="both",labelsize=tickfs)
fig2[:text](0.02, p2+h1+0.01, "Bi", fontsize=figlabelfs)

ax4=axes([l2,p2,w1,h1]); 
ax4[:plot](th,Achi1*K^2,"b",linewidth=lw)
ax4[:plot](th,Achi2*K^2,"g",linewidth=lw)
ax4[:plot](th,Achi3*K^2,"r",linewidth=lw)
ax4[:spines]["top"][:set_visible](false)
ax4[:spines]["right"][:set_visible](false)
ax4[:axis]([0,TT,-2,1.0])
ax4[:set_ylabel](L"AC($\chi$) (Hz$^2$)",fontsize=labelfs)
ax4[:set_xlabel]("Time (ms)",fontsize=labelfs)
ax4[:tick_params](axis="both",labelsize=tickfs)

fig2[:text](l2-0.1, p2+h1+0.01, "Bii", fontsize=figlabelfs)

# %% [markdown]
### Plot Fig 2Ci and 2Cii power spectra for APs and $\chi(t)$ 

# %% [code]
ax5=axes([l1,p1,w1,h1]); 
ax5[:semilogx](fHz,Swr1*K,"b",linewidth=lw)
ax5[:semilogx](fHz,Swr2*K,"g",linewidth=lw)
ax5[:semilogx](fHz,Swr3*K,"r",linewidth=lw)
ax5[:spines]["top"][:set_visible](false)
ax5[:spines]["right"][:set_visible](false)
ax5[:axis]([0.1,1000,0,18])
ax5[:set_xlabel]("Frequency (Hz)",fontsize=labelfs)
ax5[:set_ylabel]("PS(r)  (Hz)",fontsize=labelfs,labelpad=11)
ax5[:tick_params](axis="both",labelsize=tickfs)
fig2[:text](0.02, p1+h1+0.01, "Ci", fontsize=figlabelfs)

ax6=axes([l2,p1,w1,h1]); 
ax6[:semilogx](fHz,Swchi1*K,"b",linewidth=lw)
ax6[:semilogx](fHz,Swchi2*K,"g",linewidth=lw)
ax6[:semilogx](fHz,Swchi3*K,"r",linewidth=lw)
ax6[:spines]["top"][:set_visible](false)
ax6[:spines]["right"][:set_visible](false)
ax6[:axis]([0.1,1000,0,1.5])
ax6[:set_xlabel]("Frequency (Hz)",fontsize=labelfs)
ax6[:set_ylabel](L"PS($\chi$)  (Hz)",fontsize=labelfs)
ax6[:tick_params](axis="both",labelsize=tickfs)
fig2[:text](l2-0.1, p1+h1+0.01, "Cii", fontsize=figlabelfs)

# %% [markdown]
### Plot 2D Voltage mean, std and CV

# %% [code]
ax7=axes([l3,p3,w1,h1]); 
ax7[:semilogx](alphaL,MvTHalpha,"k-",linewidth=lw)
ax7[:spines]["top"][:set_visible](false)
ax7[:spines]["right"][:set_visible](false)
ax7[:axis]([0.1,10,0,9])
ax7[:set_ylabel]("mean (mV)",fontsize=labelfs,labelpad=11)
ax7[:set_xlabel](L"$\alpha$ ",fontsize=labelfs)
ax7[:set_title]("post-syn voltage",fontsize=8)
ax7[:tick_params](axis="both",labelsize=tickfs)
ax7[:set_yticks]([0,2,4,6,8])

ax8=axes([l3,p2,w1,h1]); 
ax8[:semilogx](alphaL,SvTHalpha,"k-",linewidth=lw)
ax8[:spines]["top"][:set_visible](false)
ax8[:spines]["right"][:set_visible](false)
ax8[:axis]([0.1,10,0,1.2])
ax8[:set_ylabel]("std (mV)",fontsize=labelfs)
ax8[:set_xlabel](L"$\alpha$ ",fontsize=labelfs)
ax8[:tick_params](axis="both",labelsize=tickfs)
ax8[:set_yticks]([0,0.5,1])

ax9=axes([l3,p1,w1,h1]); 
ax9[:semilogx](alphaL,CVTHalpha,"k-",linewidth=lw)
ax9[:spines]["top"][:set_visible](false)
ax9[:spines]["right"][:set_visible](false)
ax9[:axis]([0.1,10,0.1,0.2])
ax9[:set_ylabel]("CV",fontsize=labelfs)
ax9[:set_xlabel](L"$\alpha$ ",fontsize=labelfs)
ax9[:tick_params](axis="both",labelsize=tickfs)
ax9[:set_yticks]([0,0.1,0.2])

fig2[:text](l3-0.1, 0.95, "D", fontsize=figlabelfs)

# %% [markdown]
## Save the figure

# %% [code]
if true
   savefig("fig2.pdf") 
end

# %% [code]


# %% [code]


# %% [code]


# %% [code]


# %% [code]


# %% [code]


# %% [code]


# %% [code]


# %% [code]
