# Supplementary material for: Transmission of temporally correlated spike trains through synapses with short-term depression
Source: PLoS Comput Biol. 2018 Jun 22;14(6):e1006232. doi: 10.1371/journal.pcbi.1006232 (PMC6039054; doi:10.1371/journal.pcbi.1006232)
Supplement: S4 Code — It generates and plots presynaptic voltage traces and spike times for different parameter sets (Eq 44). It plots the spike-triggered occupancy 〈x〉∞ (Eq 48) and the post-synaptic voltage mean, variance, and coefficient of variation as a function of the threshold-reset difference for different presynaptic spike rates. (JSON) [file pcbi.1006232.s004.json]

# %% [markdown]
## Fig 4  

* **Fig 4A** Presynaptic LIF rate as a function of mu for different pairs of $v_{re}$ and $\sigma$.
* **Fig 4B** Examples of the voltage time courses for the cases marked with a star (all at 10Hz) in Fig 4A
* **Fig 4C** Occupancy, voltage mean, std and CV as $v_{th}-v_{re}$ and $\sigma$ covary

# %% [code]
using PyPlot
using StatsBase;
srand(6);

# %% [markdown]
## General Parameters

# %% [code]
K=1000
tau=20
vth=10

Rr=0.002

p=0.6
q=1-p

taupost=tau
mupost=0
apost=0.3
Npre=1000

rstar1=0.005
rstar2=0.01
rstar3=0.02

dt=0.01

# %% [code]
#################################################################################
#################################################################################
#################################################################################
# range of rates of mu using THIN
#################################################################################
#################################################################################
#################################################################################
function MyLIFRateOverMuTHIN(tau,mu1,mu2,muN,sigma,vre,vth)

  mu=mu1+(mu2-mu1)*(collect(1.0:1.0:muN)-1.0)/(muN-1.0)
  r=zeros(muN)

  for k=1:muN
    r[k]=MyLIFRateTHIN(tau,mu[k],sigma,vre,vth)
  end

  return mu,r

end


#################################################################################
#################################################################################
#################################################################################
# single rate for LIF but using THIN method
#################################################################################
#################################################################################
#################################################################################
function MyLIFRateTHIN(tau,mu,sig,vre,vth)

  dv=0.01
  vl=-15.0 
  v=collect(vl:dv:vth)
  n=length(v)
  kre=find(v.==vre)[1]

  G=(v-mu)/sig^2
  A=exp(dv*G)
  B=(A-1)./(sig^2*dv*G)
  B[find(G.==0)]=1/sig^2

  j0=ones(n)
  p0=zeros(n)

  for k=n:-1:2

    j0[k-1]=j0[k] - (k==kre+1)
    p0[k-1]=p0[k]*A[k] + dv*B[k]*tau*j0[k]

  end

  r0=1/(dv*sum(p0))
  P0=r0*p0 
  J0=r0*j0

  return r0

end

#################################################################################
#################################################################################
#################################################################################
# finds mu for a given sigma and r
#################################################################################
#################################################################################
#################################################################################
function MyLIFFindMu(r0,tau,sigma,vre,vth)

  mu1,mu2,muN=-5.0, 15.0, 100
  mu=mu1+(mu2-mu1)*(collect(1.0:1.0:muN)-1.0)/(muN-1.0)
  r=zeros(muN)

  for k=1:muN
    r[k]=MyLIFRateTHIN(tau,mu[k],sigma,vre,vth)
  end

  s1=maximum(find(r.<r0))
  s2=minimum(find(r.>r0))
  mu1,mu2=mu[s1],mu[s2]
  r1,r2=r[s1],r[s2]

  mu0=(r0-r1)*(mu2-mu1)/(r2-r1)+mu1

  return mu0,mu,r

end

#################################################################################
#################################################################################
#################################################################################
# makes a time series for t from an LIF
#################################################################################
#################################################################################
#################################################################################
function MyLIFPreSynAPs(dt,T,tau,mu,sigma,vre,vth)

  t=collect(dt:dt:T)
  nt=length(t)
  z=zeros(nt)
  v=zeros(nt)
  v[1]=vre

  for k=1:nt-1

    v[k+1]=v[k] + (dt/tau)*(mu-v[k]) + sigma*sqrt(2*dt/tau)*randn()  

    if v[k+1]>vth
      v[k]=vth
      v[k+1]=vre
      z[k+1]=1.0
    end
  end

  return t,z,v

end;


#################################################################################
#################################################################################
#################################################################################
# Calculates xinf using THIN method
#################################################################################
#################################################################################
#################################################################################
function MyxinfTHIN(Rr,q,tau,mu,sigma,vre,vth)

  fr=real(MyFPTDensityTHIN(tau,sigma,mu,vth,vre,-1im*Rr))

  xinfTHIN=(1-fr)/(1-q*fr)
  
  return xinfTHIN
 
end


#################################################################################
#################################################################################
#################################################################################
# Calculates FT of the FPT density f(w)
#################################################################################
#################################################################################
#################################################################################
function MyFPTDensityTHIN(tau,sig,mu,vth,vre,w)

  dv=0.01
  vl=-15.0 
  v=collect(vl:dv:vth)
  n=length(v)
  kre=find(v.==vre)[1]

  G=(v-mu)/sig^2
  A=exp(dv*G)
  B=(A-1)./(sig^2*dv*G)
  B[find(G.==0)]=1/sig^2

  jhf=ones(Complex,n)
  phf=zeros(Complex,n)

  jh0=zeros(Complex,n)
  ph0=zeros(Complex,n)

  for k=n:-1:2

    jhf[k-1]=jhf[k] + dv*1im*w*phf[k] 
    phf[k-1]=phf[k]*A[k] + dv*B[k]*tau*jhf[k]

    jh0[k-1]=jh0[k] + dv*1im*w*ph0[k] - (k==kre+1)
    ph0[k-1]=ph0[k]*A[k] + dv*B[k]*tau*jh0[k]

  end

  f=-jh0[1]/jhf[1]     

  return f

end

#################################################################################
#################################################################################
#################################################################################
# Calculates <V>,Var(V), STD(V) and CV(V) for the LIF using THIN method
#################################################################################
#################################################################################
#################################################################################
function MyVStatsAndRateTHIN(Rr,q,tau,mu,sigma,vre,vth,taupost,mupost,apost,Npre)

  p=1-q
  Ra=MyLIFRateTHIN(tau,mu,sigma,vre,vth)
  
  fr=real(MyFPTDensityTHIN(tau,sigma,mu,vth,vre,-1im*Rr))
  xinf=(1-fr)/(1-q*fr)
  Mchi=xinf*Ra*p

  ftau=real(MyFPTDensityTHIN(tau,sigma,mu,vth,vre,-1im/taupost))
  ftaur=real(MyFPTDensityTHIN(tau,sigma,mu,vth,vre,-1im*(Rr+1.0/taupost)))

  Mv=mupost + apost*taupost*Npre*Mchi
  Vv=((taupost*Npre*apost^2)/2.0)*Mchi*(1+2p*((ftau-ftaur)/((1-ftau)*(1-q*ftaur)) - taupost*Ra*xinf))
  Sv=sqrt(Vv)

 rate=MyLIFRateTHIN(taupost,Mv,sqrt(Vv),vre,vth)

  return Mv,Vv,Sv,rate
 
end

################################################################
################################################################
# does the histogram
################################################################
################################################################
function MyHist(xx,tisi)
    h = fit(Histogram, tisi,xx)
    xe=h.edges[1] 
    dx=xe[2]-xe[1] 
    x=xe[2:end]-dx/2
    y=h.weights
    y=y./sum(y*dx)
    return x,y
end

#################################################################################
# creates an occupancy time series from a presynaptic spike train.
#
# inputs:   t,z is the AP time series, p prob of release, Rr restock rate
#           and x0 is the initial condition
# outputs:  x as a time series, the list of x before the APs 
#           and c the time series of the release (chi in the notes)
#
# NOTES:    z has 1 if there is a spike, not 1/dt
#################################################################################
function MyPreSynX(t,z,p,Rr,x0)
    
    dt=t[2]-t[1]
    nz=length(z)
    x=zeros(nz); x[1]=x0
    c=zeros(nz)
    
    for k=1:nz-1
        c[k]=(rand()<p)*x[k]*z[k]
        x[k+1]=x[k] - c[k] + (rand()<dt*Rr)*(1-x[k])
    end
    
    s=find(z.>0)
    if s[1]==1
        s=s[2:end]
    end

    xinfs=x[s-1]
    
    return x,xinfs,c
end


# %% [markdown]
## Create the data

# %% [markdown]
### Fig 4A data - mu versus rate graphs with intersections at rstar2

# %% [code]
# the mu versus rate graphs and intersections

vreA,vreM,vreB=0.0, 7.0, 9.8
sigA,sigB=0.2, 4.0 
sigM=sigA+(vreM-vreA)*(sigB-sigA)/(vreB-vreA)

mustarA,mu,rA=MyLIFFindMu(rstar2,tau,sigA,vreA,vth)
mustarM,mu,rM=MyLIFFindMu(rstar2,tau,sigM,vreM,vth)
mustarB,mu,rB=MyLIFFindMu(rstar2,tau,sigB,vreB,vth);

println("sigA=$sigA sigM=$(round(sigM,2)) sigB=$sigB")
println("mustarA=$(round(mustarA,2)) mustarM=$(round(mustarM,2)) mustarB=$(round(mustarB,2))");

# %% [markdown]
### Fig 4B data - time courses for three cases examples using rstar2

# %% [code]
T=5000.0
x0=0

t,zA,vA=MyLIFPreSynAPs(dt,T,tau,mustarA,sigA,vreA,vth)
t,zM,vM=MyLIFPreSynAPs(dt,T,tau,mustarM,sigM,vreM,vth)
t,zB,vB=MyLIFPreSynAPs(dt,T,tau,mustarB,sigB,vreB,vth);

xiA,~,cA=MyPreSynX(t,zA,p,Rr,x0)
xiM,~,cB=MyPreSynX(t,zM,p,Rr,x0)
xiB,~,cC=MyPreSynX(t,zB,p,Rr,x0);

# %% [markdown]
### Fig 4C. xinf, $<V>$ ,STD(V) and CV of V for a range of vre between the two extremes above

# %% [code]
# get the theory for xinf

vreL=collect(vreA:0.2:vreB)
vreN=length(vreL)

sigL=collect(linspace(sigA,sigB,vreN))

xinfLth1,muL1=zeros(vreN), zeros(vreN)
xinfLth2,muL2=zeros(vreN), zeros(vreN)
xinfLth3,muL3=zeros(vreN), zeros(vreN)

for k=1:vreN
    
    muL1[k],mu,~=MyLIFFindMu(rstar1,tau,sigL[k],vreL[k],vth)
    muL2[k],mu,~=MyLIFFindMu(rstar2,tau,sigL[k],vreL[k],vth)
    muL3[k],mu,~=MyLIFFindMu(rstar3,tau,sigL[k],vreL[k],vth)
    
    xinfLth1[k]=MyxinfTHIN(Rr,q,tau,muL1[k],sigL[k],vreL[k],vth)
    xinfLth2[k]=MyxinfTHIN(Rr,q,tau,muL2[k],sigL[k],vreL[k],vth)
    xinfLth3[k]=MyxinfTHIN(Rr,q,tau,muL3[k],sigL[k],vreL[k],vth)
end

# now the voltages

MvL1,VvL1,SvL1=zeros(vreN), zeros(vreN), zeros(vreN)
MvL2,VvL2,SvL2=zeros(vreN), zeros(vreN), zeros(vreN)
MvL3,VvL3,SvL3=zeros(vreN), zeros(vreN), zeros(vreN)

for k=1:vreN
    MvL1[k],VvL1[k],SvL1[k],~=MyVStatsAndRateTHIN(Rr,q,tau,muL1[k],sigL[k],vreL[k],vth,taupost,mupost,apost,Npre)
    MvL2[k],VvL2[k],SvL2[k],~=MyVStatsAndRateTHIN(Rr,q,tau,muL2[k],sigL[k],vreL[k],vth,taupost,mupost,apost,Npre)
    MvL3[k],VvL3[k],SvL3[k],~=MyVStatsAndRateTHIN(Rr,q,tau,muL3[k],sigL[k],vreL[k],vth,taupost,mupost,apost,Npre)
end

CVL1=SvL1./MvL1;
CVL2=SvL2./MvL2;
CVL3=SvL3./MvL3;

# %% [code]
close("all")

# %% [markdown]
## The figure

# %% [code]
pygui(true)
fig4=figure(figsize=(7,4));

# %% [code]
clf()

l1=0.1
w1=0.25
h1=0.3
t1=0.9
b1=0.15
p1=0.15

l2=l1+w1+0.15
h2=0.3
w2=0.16
s2=0.095

l3=l2+w2+0.125

textfs=6
labelfs=9
tickfs=8
figlabelfs=12
lw=1

# %% [markdown]
### Fig 4A mu versus rate for vre and sigmas

# %% [code]
ax1=axes([l1,t1-h1,w1,h1])
ax1[:spines]["top"][:set_visible](false)
ax1[:spines]["right"][:set_visible](false)
plot(mu,K*rA,"r",linewidth=lw)
plot(mu,K*rM,"g",linewidth=lw)
plot(mu,K*rB,"b",linewidth=lw);
plot(mustarA,K*rstar2,"r*")
plot(mustarM,K*rstar2,"g*")
plot(mustarB,K*rstar2,"b*")
plot([mu[1];mu[end]],20*[1;1],"k:",linewidth=lw,color="saddlebrown")
plot([mu[1];mu[end]],10*[1;1],"k:",linewidth=lw,color="chocolate")
plot([mu[1];mu[end]],5*[1;1],"k:",linewidth=lw,color="gold")
axis([-5,12,0,30]);
xlabel(L"$\mu$ (mv)",fontsize=labelfs)
ylabel("rate (Hz)",fontsize=labelfs)
ax1[:tick_params](axis="both",labelsize=tickfs)
ax1[:set_yticks]([0,5,10,20,30])

fig4[:text](0.189,0.85,L"$(v_\mathrm{th}-v_\mathrm{re},\sigma)$",color="k",fontsize=textfs)
fig4[:text](0.17,0.78,L"$(0.2,4.0)$",color="b",fontsize=textfs,rotation=70)
fig4[:text](0.23,0.77,L"$(3,2.9)$",color="g",fontsize=textfs,rotation=70)
fig4[:text](0.29,0.78,L"$(10,0.2)$",color="r",fontsize=textfs,rotation=70)

fig4[:text](0.02, 0.94, "A", fontsize=figlabelfs)


# %% [markdown]
### Fig 4B voltage time-course examples

# %% [code]
TT=500;
j=10

ms=2

l1b=0
w1e=w1+l1b

tpA=t[find(zA.==1)]; ypA=ones(length(tpA))
tpM=t[find(zM.==1)]; ypM=ones(length(tpM))
tpB=t[find(zB.==1)]; ypB=ones(length(tpB))

ax2=axes([l1-l1b,p1+0.21,w1e,0.1])
ax2[:spines]["top"][:set_visible](false)
ax2[:spines]["right"][:set_visible](false)
ax2[:spines]["left"][:set_visible](false)
ax2[:spines]["bottom"][:set_visible](false)
ax2[:set_yticks]([])
ax2[:set_xticks]([])
plot(t[1:j:end],vB[1:j:end],"b-",linewidth=lw)
plot(tpB,ypB*13,"*k",markersize=ms)
axis([-10,TT,-10,14])

ax3=axes([l1-l1b,p1+0.09,w1e,0.1])
plot(t[1:j:end],vM[1:j:end],"g-",linewidth=lw)
plot(tpM,ypM*13,"*k",markersize=ms)
ax3[:spines]["top"][:set_visible](false)
ax3[:spines]["right"][:set_visible](false)
ax3[:spines]["left"][:set_visible](false)
ax3[:spines]["bottom"][:set_visible](false)
ax3[:set_yticks]([])
ax3[:set_xticks]([])
axis([0,TT,-10,14])

ax4=axes([l1-l1b,p1,w1e,0.1])
ax4[:spines]["top"][:set_visible](false)
ax4[:spines]["right"][:set_visible](false)
ax4[:spines]["left"][:set_visible](false)
plot(t[1:j:end],vA[1:j:end],"r-",linewidth=lw)
plot(tpA,ypA*13,"*k",markersize=ms)
ax4[:set_yticks]([])
axis([0,TT+0.1,-10,14]);
ax4[:set_xlabel]("Time (ms)",fontsize=labelfs)
ax4[:tick_params](axis="both",labelsize=tickfs)

fig4[:text](0.02, 0.45, "B", fontsize=figlabelfs)


# %% [markdown]
### Fig 4D xinf, voltage mean, std and CV

# %% [code]

# xinf
ax5=axes([l2,t1-h2,w2,h2])
ax5[:spines]["top"][:set_visible](false)
ax5[:spines]["right"][:set_visible](false)
ax5[:plot](vth-vreL,xinfLth1,linewidth=lw,color="saddlebrown")
ax5[:plot](vth-vreL,xinfLth2,linewidth=lw,color="chocolate")
ax5[:plot](vth-vreL,xinfLth3,linewidth=lw,color="gold")
ax5[:axis]([0,10,0.0,0.5])
ax5[:set_xlabel](L"pre-syn $v_\mathrm{th}\!-\!v_\mathrm{re}$",fontsize=labelfs)
ax5[:set_ylabel](L" occupancy $\langle x \rangle_{\infty}$",fontsize=labelfs)
ax5[:tick_params](axis="both",labelsize=tickfs)

# voltage mean
ax6=axes([l2,p1,w2,h2])
ax6[:spines]["top"][:set_visible](false)
ax6[:spines]["right"][:set_visible](false)
ax6[:plot](vth-vreL,MvL1,linewidth=lw,color="saddlebrown")
ax6[:plot](vth-vreL,MvL2,linewidth=lw,color="chocolate")
ax6[:plot](vth-vreL,MvL3,linewidth=lw,color="gold")
axis([0,10,0,11])
ax6[:set_xlabel](L"pre-syn $v_\mathrm{th}\!-\!v_\mathrm{re}$",fontsize=labelfs)
ax6[:set_ylabel]("Voltage mean (mV)",fontsize=labelfs)
ax6[:tick_params](axis="both",labelsize=tickfs)

# voltage std
ax7=axes([l3,t1-h2,w2,h2])
ax7[:spines]["top"][:set_visible](false)
ax7[:spines]["right"][:set_visible](false)
ax7[:plot](vth-vreL,SvL1,linewidth=lw,color="saddlebrown")
ax7[:plot](vth-vreL,SvL2,linewidth=lw,color="chocolate")
ax7[:plot](vth-vreL,SvL3,linewidth=lw,color="gold")
axis([0,10,00.5,1.4])
ax7[:set_xlabel](L"pre-syn $v_\mathrm{th}\!-\!v_\mathrm{re}$",fontsize=labelfs)
ax7[:set_ylabel]("Voltage std (mV)",fontsize=labelfs)
ax7[:tick_params](axis="both",labelsize=tickfs)

# voltage CV
ax8=axes([l3,p1,w2,h2])
ax8[:spines]["top"][:set_visible](false)
ax8[:spines]["right"][:set_visible](false)
ax8[:plot](vth-vreL,CVL1,linewidth=lw,color="saddlebrown")
ax8[:plot](vth-vreL,CVL2,linewidth=lw,color="chocolate")
ax8[:plot](vth-vreL,CVL3,linewidth=lw,color="gold")
axis([0,10,0.1,0.2])
ax8[:set_xlabel](L"pre-syn $v_\mathrm{th}\!-\!v_\mathrm{re}$",fontsize=labelfs)
ax8[:set_ylabel]("Voltage CV ",fontsize=labelfs)
ax8[:tick_params](axis="both",labelsize=tickfs)

fig4[:text](l2-0.1, 0.945, "C", fontsize=figlabelfs)
fig4[:text](l2+0.05, 0.93, "occupancy and post-synaptic Voltage", fontsize=labelfs)

# %% [markdown]
### Save the figure

# %% [code]
savefig("fig4.pdf")

# %% [code]


# %% [code]


# %% [code]


# %% [code]


# %% [code]


# %% [code]


# %% [code]


# %% [code]


# %% [code]


# %% [code]


# %% [code]
