# Supplementary material for: Transmission of temporally correlated spike trains through synapses with short-term depression
Source: PLoS Comput Biol. 2018 Jun 22;14(6):e1006232. doi: 10.1371/journal.pcbi.1006232 (PMC6039054; doi:10.1371/journal.pcbi.1006232)
Supplement: S5 Code — It generates and plots presynaptic voltage traces and spike times for different parameter sets (Eq 49). It plots the spike-triggered occupancy 〈x〉∞ and the post-synaptic voltage mean, variance, and simulated and estimated firing rates as a function of the threshold-reset difference for different presynaptic spike rates [44]. (JSON) [file pcbi.1006232.s005.json]

# %% [markdown]
## Fig 5 

* **Fig 5A.** presynaptic rate as function of mu for various pairs of sigma and vT-vre
* **Fig 5B.** examples time courses
* **Fig 5C.** xinf as function of vT-vre
* **Fig 5D.** <V> as function of vT-vre
* **Fig 5E.** V std as function of vT-vre
* **Fig 5F.** post-syn rate as function of vT-vre

# %% [code]
using PyPlot
srand(6);

# %% [markdown]
## General parameters

# %% [code]
K=1000.0

tau=20.0
dT=1.5
vT=10.0
vth=20.0

Rr=0.002
p=0.6
q=1-p

taupost=tau
mupost=0.0
apost=0.3
Npre=1000
vrepost=5.0

dt=0.1
T=20*1000.0

# %% [markdown]
## Functions

# %% [code]
#################################################################################
#################################################################################
#################################################################################
# makes a time series for t from an EIF
#################################################################################
#################################################################################
#################################################################################
function MyEIFPreSynAPs(dt,T,tau,mu,sigma,dT,vT,vre,vth)

  t=collect(dt:dt:T)
  nt=length(t)
  z=zeros(nt)
  v=zeros(nt)
  v[1]=vre

  for k=1:nt-1
        
    v[k+1]=v[k] + (dt/tau)*(mu-v[k]+dT*exp((v[k]-vT)/dT)) + sigma*sqrt(2*dt/tau)*randn()  

    if v[k+1]>vth
      v[k]=vth
      v[k+1]=vre
      z[k+1]=1.0
    end
  end
  
  return t,z,v

end

#################################################################################
#################################################################################
#################################################################################
# finds mu for a given sigma and r
#################################################################################
#################################################################################
#################################################################################
function MyEIFFindMu(r0,tau,sigma,dT,vT,vre,vth)

  mu1,mu2,muN=0.0, 20.0, 100
  mu=mu1+(mu2-mu1)*(collect(1.0:1.0:muN)-1.0)/(muN-1.0)
  r=zeros(muN)

  for k=1:muN
    r[k]=MyEIFRateTHIN(tau,mu[k],sigma,dT,vT,vre,vth)
  end
    
  s1=maximum(find(r.<r0))
  s2=minimum(find(r.>r0))
    
  mu1,mu2=mu[s1],mu[s2]
  r1,r2=r[s1],r[s2]

  mu0=(r0-r1)*(mu2-mu1)/(r2-r1)+mu1 

  return mu0,mu,r

end

#################################################################################
#################################################################################
#################################################################################
# range of rates of mu using THIN
#################################################################################
#################################################################################
#################################################################################
function MyEIFRateOverMuTHIN(tau,mu1,mu2,muN,sigma,dT,vT,vre,vth)

  mu=mu1+(mu2-mu1)*(collect(1.0:1.0:muN)-1.0)/(muN-1.0)
  r=zeros(muN)

  for k=1:muN
    r[k]=MyEIFRateTHIN(tau,mu[k],sigma,dT,vT,vre,vth)
  end

  return mu,r

end

#################################################################################
#################################################################################
#################################################################################
# single rate for EIF but using THIN method
#################################################################################
#################################################################################
#################################################################################
function MyEIFRateTHIN(tau,mu,sig,dT,vT,vre,vth)

dv=0.01
vl=-15.0 
v=collect(vl:dv:vth)
n=length(v)
kre=maximum(find(v.<vre))

  G=(v-mu-dT*exp((v-vT)/dT))/sig^2
  A=exp(dv*G)
  B=(A-1)./(sig^2*dv*G)
  B[find(G.==0)]=1/sig^2

  j0=ones(n)
  p0=zeros(n)

  for k=n:-1:2

    j0[k-1]=j0[k] - (k==kre+1)
    p0[k-1]=p0[k]*A[k] + dv*B[k]*tau*j0[k]

  end

  r0=1/(dv*sum(p0))
  P0=r0*p0 
  J0=r0*j0

  return r0

end

#################################################################################
#################################################################################
#################################################################################
# Calculates FT of the FPT density f(w)
#################################################################################
#################################################################################
#################################################################################
function MyFPTDensityTHIN(tau,sig,mu,dT,vT,vth,vre,w)

  dv=0.01
  vl=-15.0 
  v=collect(vl:dv:vth)
  n=length(v)
  kre=maximum(find(v.<vre))

  G=(v-mu-dT*exp((v-vT)/dT))/sig^2
  A=exp(dv*G)
  B=(A-1)./(sig^2*dv*G)
  B[find(G.==0)]=1/sig^2

  jhf=ones(Complex,n)
  phf=zeros(Complex,n)

  jh0=zeros(Complex,n)
  ph0=zeros(Complex,n)

  for k=n:-1:2

    jhf[k-1]=jhf[k] + dv*1im*w*phf[k] 
    phf[k-1]=phf[k]*A[k] + dv*B[k]*tau*jhf[k]

    jh0[k-1]=jh0[k] + dv*1im*w*ph0[k] - (k==kre+1)
    ph0[k-1]=ph0[k]*A[k] + dv*B[k]*tau*jh0[k]

  end

  f=-jh0[1]/jhf[1]     

  return f

end

#################################################################################
#################################################################################
#################################################################################
# Calculates xinf using THIN method
#################################################################################
#################################################################################
#################################################################################
function MyxinfTHIN(Rr,q,tau,mu,sigma,dT,vT,vre,vth)

  fr=real(MyFPTDensityTHIN(tau,sigma,mu,dT,vT,vth,vre,-1im*Rr))
  xinfTHIN=(1-fr)/(1-q*fr)
  
  return xinfTHIN
 
end

#################################################################################
#################################################################################
#################################################################################
# Calculates <V>,Var(V), STD(V) and CV(V) for the EIF using THIN method
#################################################################################
#################################################################################
#################################################################################
function MyVStatsAndRateTHIN(Rr,q,tau,mu,sigma,dT,vT,vre,vth,taupost,mupost,apost,vrepost,Npre)

  p=1-q
  Ra=MyEIFRateTHIN(tau,mu,sigma,dT,vT,vre,vth)
  
  fr=real(MyFPTDensityTHIN(tau,sigma,mu,dT,vT,vth,vre,-1im*Rr))
  xinf=(1-fr)/(1-q*fr)
  Mchi=xinf*Ra*p

  ftau=real(MyFPTDensityTHIN(tau,sigma,mu,dT,vT,vth,vre,-1im/taupost))
  ftaur=real(MyFPTDensityTHIN(tau,sigma,mu,dT,vT,vth,vre,-1im*(Rr+1.0/taupost)))

  Mv=mupost + apost*taupost*Npre*Mchi
  Vv=((taupost*Npre*apost^2)/2.0)*Mchi*(1+2p*((ftau-ftaur)/((1-ftau)*(1-q*ftaur)) - taupost*Ra*xinf))
  Sv=sqrt(Vv)

  rate=MyEIFRateTHIN(taupost,Mv,sqrt(Vv),dT,vT,vrepost,vth)

  return Mv,Vv,Sv,rate
 
end

#################################################################################
#################################################################################
#################################################################################
# Calculates FT of the FPT density f(w)
#################################################################################
#################################################################################
#################################################################################
function MyFPTDensityTHIN(tau,sig,mu,dT,vT,vth,vre,w)

  dv=0.01
  vl=-15.0 
  v=collect(vl:dv:vth)
  n=length(v)
  kre=maximum(find(v.<vre))

  G=(v-mu-dT*exp((v-vT)/dT))/sig^2
  A=exp(dv*G)
  B=(A-1)./(sig^2*dv*G)
  B[find(G.==0)]=1/sig^2

  jhf=ones(Complex,n)
  phf=zeros(Complex,n)

  jh0=zeros(Complex,n)
  ph0=zeros(Complex,n)

  for k=n:-1:2

    jhf[k-1]=jhf[k] + dv*1im*w*phf[k] 
    phf[k-1]=phf[k]*A[k] + dv*B[k]*tau*jhf[k]

    jh0[k-1]=jh0[k] + dv*1im*w*ph0[k] - (k==kre+1)
    ph0[k-1]=ph0[k]*A[k] + dv*B[k]*tau*jh0[k]

  end

  f=-jh0[1]/jhf[1]     

  return f

end

#################################################################################
#################################################################################
#################################################################################
# does a voltage run for presynaptic EIF neurons
#################################################################################
#################################################################################
#################################################################################
function MyDoEIFVoltRun(tau,mu,sig,dT,vT,vre,vth,Rr,p,dt,T,taupost,mupost,apost,vrepost,Npre)

  t=collect(dt:dt:T)
  nt=length(t)
  S=zeros(nt)

  for j=1:Npre
    t,z=MyEIFPreSynAPs(dt,T,tau,mu,sig,dT,vT,vre,vth)
    x,xinfs,chi=MyPreSynX(z,p,Rr,dt,0.0)
    S=S+chi/dt
  end

  v=zeros(nt)
  v[1]=mupost

  w=zeros(nt)
  w[1]=mupost
  c=0

  for k=1:nt-1
        v[k+1]=v[k]+(dt/taupost)*(mupost - v[k] + apost*taupost*S[k])

    w[k+1]=w[k]+(dt/taupost)*(mupost - w[k] +dT*exp((w[k]-vT)/dT)+ apost*taupost*S[k])
    if w[k+1]>vth
     c=c+1
     w[k]=vth
     w[k+1]=vrepost
   end

  end

  Mv=mean(v)
  Vv=var(v)
  r=c/T

  return t,v,Mv,Vv,r

end


# %% [code]
#################################################################################
#################################################################################
#################################################################################
# does an occupancy calculation given a time series of APs.
# Initial occupancy is x0
#################################################################################
#################################################################################
#################################################################################
function MyPreSynX(z,p,Rr,dt,x0)

  nz=length(z)
  x=zeros(nz); x[1]=x0
  chi=zeros(nz)

  for k=1:nz-1
    chi[k]=(rand()<p)*x[k]*z[k]
    x[k+1]=x[k] - chi[k] + (rand()<dt*Rr)*(1-x[k])
  end

  s=find(z.>0)
  if s[1]==1
    s=s[2:end]
  end

  xinfs=x[s-1]
  
  return x,xinfs,chi

end


# %% [code]
#################################################################################
#################################################################################
#################################################################################
# calculates the voltage mean and variance
#################################################################################
#################################################################################
#################################################################################
function MyVStatsAndRateNn(Rr,q,tau,mu,sigma,dT,vT,vre,vth,taupost,mupost,apost,vrepost,Npre,npre)

    q=1-p
    Ra=MyEIFRateTHIN(tau,mu,sigma,dT,vT,vre,vth)
    
    # theory
    L1=real(MyFPTDensityTHIN(tau,sigma,mu,dT,vT,vth,vre,-1im*Rr))
    L2=real(MyFPTDensityTHIN(tau,sigma,mu,dT,vT,vth,vre,-2im*Rr))
    
    xinf=(1-L1)/(1-q*L1)
    xxinf=(2*q*xinf*(L1-L2) + 1-2*L1+L2)/(1-q^2*L2)
    Mchi=Ra*xinf*p
    
    C1=real(MyFPTDensityTHIN(tau,sigma,mu,dT,vT,vth,vre,-1im/taupost)) # with tau
    C2=real(MyFPTDensityTHIN(tau,sigma,mu,dT,vT,vth,vre,-1im*(Rr+1.0/taupost)))
    C3=(C1-C2)/((1-C1)*(1-q*C2))
    
    Mv=mupost + apost*taupost*Npre*npre*p*Ra*xinf
    
    VvTH1=(taupost*Npre*npre*apost^2*Mchi/2.0)*(1+2*p*npre*(C3-taupost*Ra*xinf))
    VvTH2=(taupost*Npre*npre*apost^2*Mchi/2.0)*(npre-1)*p*(xxinf/xinf)*(1+2*q*C2/(1-q*C2))
    Vv=VvTH1+VvTH2
    
    Sv=sqrt(Vv)
    
    rate=MyEIFRateTHIN(taupost,Mv,sqrt(Vv),dT,vT,vrepost,vth)
    
    return Mv,Vv,Sv,rate
  

end


# %% [code]
#################################################################################
#################################################################################
#################################################################################
# does a voltage run
#################################################################################
#################################################################################
#################################################################################
function MyDoEIFVoltRunNn(tau,mu,sig,dT,vT,vre,vth,Rr,p,dt,T,taupost,mupost,apost,vrepost,Npre,npre)

  t=collect(dt:dt:T)
  nt=length(t)
  S=zeros(nt)

    # does run over presynaptic neurons j=1:N and their contacts i=1:n
    for j=1:Npre
        t,z=MyEIFPreSynAPs(dt,T,tau,mu,sig,dT,vT,vre,vth)
        for i=1:npre
            x,xinfs,chi=MyPreSynX(z,p,Rr,dt,0.0)
            S=S+chi/dt
        end
    end
    
    v=zeros(nt)
    v[1]=mupost

    w=zeros(nt)
    w[1]=mupost
    c=0
    
    for k=1:nt-1
        v[k+1]=v[k]+(dt/taupost)*(mupost - v[k] + apost*taupost*S[k])
        w[k+1]=w[k]+(dt/taupost)*(mupost - w[k] + dT*exp((w[k]-vT)/dT) + apost*taupost*S[k])
        
        if w[k+1]>vth
            c=c+1
            w[k]=vth
            w[k+1]=vrepost
        end
    end
    
  Mv=mean(v)
  Vv=var(v)
  r=c/T
    
  return t,v,Mv,Vv,r

end


# %% [markdown]
## Create the data

# %% [markdown]
### Fig 5A data - rate versus mu

# %% [code]
# get the three examples

rstar=0.01

vreA,vreM,vreB=0.0,9.0,13.0
sigA,sigB=0.2, 2.0 
sigM=sigA+(vreM-vreA)*(sigB-sigA)/(vreB-vreA);

mustarA,mu,rA=MyEIFFindMu(rstar,tau,sigA,dT,vT,vreA,vth)
mustarM,mu,rM=MyEIFFindMu(rstar,tau,sigM,dT,vT,vreM,vth)
mustarB,mu,rB=MyEIFFindMu(rstar,tau,sigB,dT,vT,vreB,vth)

println("vreA=$vreA \t vreM=$vreM \t vreB=$vreB")
println("sigA=$(round(sigA,2)) \t sigM=$(round(sigM,2)) \t sigB=$(round(sigB,2))")
println("mustarA=$(round(mustarA,2)) \t mustarM=$(round(mustarM,2)) \t mustarB=$(round(mustarB,2))")

# %% [markdown]
### Fig 5B data - example time courses

# %% [code]
# get some example time courses

dt=0.005
T=10*1000.0
x0=0

t,zA,vA=MyEIFPreSynAPs(dt,T,tau,mustarA,sigA,dT,vT,vreA,vth);
t,zM,vM=MyEIFPreSynAPs(dt,T,tau,mustarM,sigM,dT,vT,vreM,vth);
t,zB,vB=MyEIFPreSynAPs(dt,T,tau,mustarB,sigB,dT,vT,vreB,vth);

rAsim=K*sum(zA)/T;
rMsim=K*sum(zM)/T;
rBsim=K*sum(zB)/T;
println("sim: rA=$rAsim rM=$rAsim rB=$rBsim")

# %% [code]
pygui(false)
figure(figsize=(8,3))
subplot(6,1,1); plot(t,vB)
subplot(6,1,2); plot(t,zB)

subplot(6,1,3); plot(t,vM)
subplot(6,1,4); plot(t,zM)

subplot(6,1,5); plot(t,vA)
subplot(6,1,6); plot(t,zA)

# %% [markdown]
### Fig 5C data - xinf

# %% [code]
# this calculates <xinf> continuously over the range vre

vreL=collect(vreA:0.5:vreB)
vreN=length(vreL)

sigL=collect(linspace(sigA,sigB,vreN))
xinfLth,muL=zeros(vreN), zeros(vreN)

for k=1:vreN
    
    muL[k],mu,~=MyEIFFindMu(rstar,tau,sigL[k],dT,vT,vreL[k],vth)
    xinfLth[k]=MyxinfTHIN(Rr,q,tau,muL[k],sigL[k],dT,vT,vreL[k],vth)
    
end

xpoiss=Rr/(Rr+p*rstar);

# %% [markdown]
### Fig 5D, 5E and 5F data - voltage mean, std and the post rate theory

# %% [code]
# theory for N and n

N1,n1=1000,1; 
N2,n2=100,10; 
N3,n3=50,20; 
N4,n4=25,40; 

# this one calculates voltage mean, std and variance for an n=1 N=1000 case
# and also the rate using the matched variance method

MvL1,VvL1,SvL1,rpost1=zeros(vreN), zeros(vreN), zeros(vreN),zeros(vreN)
MvL2,VvL2,SvL2,rpost2=zeros(vreN), zeros(vreN), zeros(vreN),zeros(vreN)
MvL3,VvL3,SvL3,rpost3=zeros(vreN), zeros(vreN), zeros(vreN),zeros(vreN)
MvL4,VvL4,SvL4,rpost4=zeros(vreN), zeros(vreN), zeros(vreN),zeros(vreN)

for k=1:vreN
    MvL1[k],VvL1[k],SvL1[k],rpost1[k]=MyVStatsAndRateNn(Rr,q,tau,muL[k],sigL[k],dT,vT,vreL[k],vth,taupost,mupost,apost,vrepost,N1,n1)
    MvL2[k],VvL2[k],SvL2[k],rpost2[k]=MyVStatsAndRateNn(Rr,q,tau,muL[k],sigL[k],dT,vT,vreL[k],vth,taupost,mupost,apost,vrepost,N2,n2)
    MvL3[k],VvL3[k],SvL3[k],rpost3[k]=MyVStatsAndRateNn(Rr,q,tau,muL[k],sigL[k],dT,vT,vreL[k],vth,taupost,mupost,apost,vrepost,N3,n3)
    MvL4[k],VvL4[k],SvL4[k],rpost4[k]=MyVStatsAndRateNn(Rr,q,tau,muL[k],sigL[k],dT,vT,vreL[k],vth,taupost,mupost,apost,vrepost,N4,n4)
end


# %% [code]
# simulations for differing N and n

vreLsim=collect(vreA:1.0:vreB)
vreNsim=length(vreLsim)

sigLsim=collect(linspace(sigA,sigB,vreN))
muLsim=zeros(vreNsim)

for k=1:vreNsim
    muLsim[k],mu,~=MyEIFFindMu(rstar,tau,sigLsim[k],dT,vT,vreLsim[k],vth)
end

rpostsim1,Mvpostsim1,Vvpostsim1=zeros(vreNsim),zeros(vreNsim),zeros(vreNsim)
rpostsim2,Mvpostsim2,Vvpostsim2=zeros(vreNsim),zeros(vreNsim),zeros(vreNsim)
rpostsim3,Mvpostsim3,Vvpostsim3=zeros(vreNsim),zeros(vreNsim),zeros(vreNsim)
rpostsim4,Mvpostsim4,Vvpostsim4=zeros(vreNsim),zeros(vreNsim),zeros(vreNsim)

dt=0.1
T=40*1000.0

tic()
for k=1:vreNsim
    tic()
    ~,~,Mvpostsim1[k],Vvpostsim1[k],rpostsim1[k]=MyDoEIFVoltRunNn(tau,muLsim[k],sigLsim[k],dT,vT,vreLsim[k],vth,Rr,p,dt,T,taupost,mupost,apost,vrepost,N1,n1)
    ~,~,Mvpostsim2[k],Vvpostsim2[k],rpostsim2[k]=MyDoEIFVoltRunNn(tau,muLsim[k],sigLsim[k],dT,vT,vreLsim[k],vth,Rr,p,dt,T,taupost,mupost,apost,vrepost,N2,n2)
    ~,~,Mvpostsim3[k],Vvpostsim3[k],rpostsim3[k]=MyDoEIFVoltRunNn(tau,muLsim[k],sigLsim[k],dT,vT,vreLsim[k],vth,Rr,p,dt,T,taupost,mupost,apost,vrepost,N3,n3)
    ~,~,Mvpostsim4[k],Vvpostsim4[k],rpostsim4[k]=MyDoEIFVoltRunNn(tau,muLsim[k],sigLsim[k],dT,vT,vreLsim[k],vth,Rr,p,dt,T,taupost,mupost,apost,vrepost,N4,n4)
    toc()
end
toc()

Svpostsim1=sqrt(Vvpostsim1);
Svpostsim2=sqrt(Vvpostsim2);
Svpostsim3=sqrt(Vvpostsim3);
Svpostsim4=sqrt(Vvpostsim4);


# %% [markdown]
## Plot the figure

# %% [code]
close("all")
pygui(true)
fig5=figure(figsize=(7,4));

# %% [code]
clf()

l1=0.1
w1=0.25
h1=0.3
t1=0.9
b1=0.15
p1=0.15

l2=l1+w1+0.15
h2=0.3
w2=0.16
s2=0.095

l3=l2+w2+0.125

textfs=6
labelfs=8
tickfs=8
figlabelfs=12
lw=1;

plotsims=false

# %% [markdown]
### Fig 5A - plot rate versus mu

# %% [code]
h1=0.3
ax1=axes([l1,t1-h1,w1,h1])
plot(mu,K*rA,"r",linewidth=lw)
plot(mu,K*rM,"g",linewidth=lw)
plot(mu,K*rB,"b",linewidth=lw);
plot([mu[1];mu[end]],10*[1,1],"k:",linewidth=lw)
plot(mustarA,K*rstar,"r*")
plot(mustarM,K*rstar,"g*")
plot(mustarB,K*rstar,"b*")
ax1[:spines]["top"][:set_visible](false)
ax1[:spines]["right"][:set_visible](false)
ylabel("pre-syn rate (Hz)",fontsize=labelfs)
xlabel("mu (mV)",fontsize=labelfs)
ax1[:tick_params](axis="both",labelsize=tickfs)
axis([0,15,0,30]);

fig5[:text](0.02, 0.945, "A", fontsize=figlabelfs)

# %% [markdown]
### Fig 5B - plot voltage time courses

# %% [code]
Tshow=1000;
j=2

ms=2

l1b=0
w1e=w1+l1b

tpA=t[find(zA.==1)]; ypA=ones(length(tpA))
tpM=t[find(zM.==1)]; ypM=ones(length(tpM))
tpB=t[find(zB.==1)]; ypB=ones(length(tpB))

ax2=axes([l1-l1b,p1+0.21,w1e,0.1])
ax2[:spines]["top"][:set_visible](false)
ax2[:spines]["right"][:set_visible](false)
ax2[:spines]["left"][:set_visible](false)
ax2[:spines]["bottom"][:set_visible](false)
ax2[:set_yticks]([])
ax2[:set_xticks]([])
plot(t[1:j:end],vB[1:j:end],"b-",linewidth=lw)
plot(tpB,ypB*24,"*k",markersize=ms)
axis([-10,Tshow,-10,25])

ax3=axes([l1-l1b,p1+0.09,w1e,0.1])
plot(t[1:j:end],vM[1:j:end],"g-",linewidth=lw)
plot(tpM,ypM*24,"*k",markersize=ms)
ax3[:spines]["top"][:set_visible](false)
ax3[:spines]["right"][:set_visible](false)
ax3[:spines]["left"][:set_visible](false)
ax3[:spines]["bottom"][:set_visible](false)
ax3[:set_yticks]([])
ax3[:set_xticks]([])
axis([0,Tshow,-10,25])

ax4=axes([l1-l1b,p1,w1e,0.1])
ax4[:spines]["top"][:set_visible](false)
ax4[:spines]["right"][:set_visible](false)
ax4[:spines]["left"][:set_visible](false)
plot(t[1:j:end],vA[1:j:end],"r-",linewidth=lw)
plot(tpA,ypA*24,"*k",markersize=ms)
ax4[:set_yticks]([])
axis([0,Tshow+0.1,-10,25]);
ax4[:set_xlabel]("Time (ms)",fontsize=labelfs)
ax4[:tick_params](axis="both",labelsize=tickfs)

fig5[:text](0.02, 0.45, "B", fontsize=figlabelfs)

# %% [markdown]
### fig 5C - plot xinf

# %% [code]
vTvre=vT-vreL
vTvresim=vT-vreLsim

ax5=axes([l2,t1-h2,w2,h2])
plot(vTvre,xinfLth,linewidth=lw,"k-")
#plot([vT-vreL[end];10],[1;1]*xpoiss,"k:")
xlabel(L"pre-syn $v_\mathrm{T}-v_\mathrm{re}$",fontsize=labelfs)
ylabel(L"occupancy $\langle x \rangle_{\infty}$",fontsize=labelfs)
ax5[:spines]["top"][:set_visible](false)
ax5[:spines]["right"][:set_visible](false)
axis([-2,10,0.2,0.3]);
ax5[:tick_params](axis="both",labelsize=tickfs)
ax5[:set_yticks]([0.2,0.25,0.3])

fig5[:text](0.41, 0.945, "C", fontsize=figlabelfs)

# %% [markdown]
### fig 5D - plot mean voltage

# %% [code]
ms=2
lw=1
ax6=axes([l2,p1,w2,h2])
ax6[:spines]["top"][:set_visible](false)
ax6[:spines]["right"][:set_visible](false)
plot(vTvre,MvL1,color="black",linewidth=lw)
if plotsims
    plot(vTvresim,Mvpostsim1,"o",color="silver",markersize=ms)
    plot(vTvresim,Mvpostsim2,"o",color="gold",markersize=ms)
    plot(vTvresim,Mvpostsim3,"o",color="darkorange",markersize=ms)
    plot(vTvresim,Mvpostsim4,"o",color="purple",markersize=ms)
end
ylabel("post-syn volt mean (mV)",fontsize=labelfs)
xlabel(L"pre-syn $v_\mathrm{T}-v_\mathrm{re}$",fontsize=labelfs)
axis([vTvre[end],vTvre[1],5.0,10])
ax6[:tick_params](axis="both",labelsize=tickfs)
ax6[:set_yticks]([5,6,7,8,9,10])


fig5[:text](0.41, 0.45, "D", fontsize=figlabelfs)

# %% [markdown]
### Fig 5E - plot voltage std

# %% [code]
ms=2
ax7=axes([l3,t1-h2,w2,h2])
ax7[:spines]["top"][:set_visible](false)
ax7[:spines]["right"][:set_visible](false)
plot(vTvre,SvL1,"-",color="silver",linewidth=lw)
plot(vTvre,SvL2,"gold",linewidth=lw)
plot(vTvre,SvL3,"darkorange",linewidth=lw)
plot(vTvre,SvL4,"purple",linewidth=lw)
if plotsims
    plot(vTvresim,Svpostsim1,"o",color="silver",markersize=ms)
    plot(vTvresim,Svpostsim2,"o",color="gold",markersize=ms)
    plot(vTvresim,Svpostsim3,"o",color="darkorange",markersize=ms)
    plot(vTvresim,Svpostsim4,"o",color="purple",markersize=ms)
end
    ylabel("post-syn volt std (mV)",fontsize=labelfs)
xlabel(L"pre-syn $v_\mathrm{T}-v_\mathrm{re}$",fontsize=labelfs)
axis([vTvre[end],vTvre[1],0,4.2])
ax7[:tick_params](axis="both",labelsize=tickfs)

fig5[:text](0.7, 0.945, "E", fontsize=figlabelfs)

# %% [markdown]
### Fig 5F - plot postsynaptic rate

# %% [code]

ax8=axes([l3,p1,w2,h2])
ax8[:spines]["top"][:set_visible](false)
ax8[:spines]["right"][:set_visible](false)
plot(vTvre,K*rpost1,"-",color="silver",linewidth=lw)
plot(vTvre,K*rpost2,"-",color="gold",linewidth=lw)
plot(vTvre,K*rpost3,"-",color="darkorange",linewidth=lw)
plot(vTvre,K*rpost4,"-",color="purple",linewidth=lw)
plot(vTvresim,K*rpostsim1,"o",color="silver",markersize=ms)
plot(vTvresim,K*rpostsim2,"o",color="gold",markersize=ms)
plot(vTvresim,K*rpostsim3,"o",color="darkorange",markersize=ms)
plot(vTvresim,K*rpostsim4,"o",color="purple",markersize=ms)
axis([vTvre[end],10.5,0,18])
xlabel(L"pre-syn $v_\mathrm{T}-v_\mathrm{re}$",fontsize=labelfs)
ylabel("post-syn rate (Hz)",fontsize=labelfs)
ax8[:tick_params](axis="both",labelsize=tickfs)

fig5[:text](0.7, 0.45, "F", fontsize=figlabelfs)

# %% [markdown]
### Save the figure

# %% [code]
savefig("fig5.pdf")

# %% [code]


# %% [code]


# %% [code]


# %% [code]


# %% [code]


# %% [code]


# %% [code]


# %% [code]


# %% [code]


# %% [code]


# %% [code]


# %% [code]


# %% [code]


# %% [code]


# %% [code]


# %% [code]
